# Supplementary material for: Human impact on forests in early twentieth century Finland
Source: Springer Nature journal article supplement (doi:10.1007/s10980-023-01688-w), 2023-05-31
Supplement: 10980_2023_1688_MOESM1_ESM.pdf [file 10980_2023_1688_MOESM1_ESM.pdf]

1 Supplementary Information to "Human impact on forests of early 20<sup>th</sup> century Finland"  
2 submitted to Landscape Ecology, by: Tuomas Aakala, Niko Kulha, and Timo Kuuluvainen.

3  
4 Corresponding author: Tuomas Aakala, School of Forest Sciences, University of Eastern  
5 Finland. E-mail: tuomas.aakala@uef.fi

6  
7 **Supplementary Information 1: locating the sample plots.**

8  
9 To locate the plots and to assess the uncertainty in this location information, we devised the  
10 following procedure:

11  
12 1. The approximate location of each inventory line was digitized from the map in (Ilvessalo  
13 1927).

14  
15 2. Inventory lines were not completed one at a time, but in shorter parts; some from SW to NE,  
16 some from NE to SW. As each compartment also contained information on the parish in which it  
17 was located, we then digitized the parishes from the Atlas of Finland 1925 (Witting 1928).

18  
19 3. We located each compartment along the inventory line using the recorded distance from the  
20 line beginning, and examined how well the parish information fitted the digitized locations  
21 within each parish.

22  
23 4. Using this information, we determined the line parts that were running from SW to NE, and  
24 lines running from NE to SW.

25  
26 5. Some parts of the lines ended and started at parish borders, which made it easy to decipher the  
27 correct order. However, some parts did not. We then realized that the line parts that these later  
28 cases were located along railroads (railroads were one compartment type recorded in the data).  
29 We thus digitized the railroads from the Atlas of Finland 1925 (Fig. 1, Witting 1928).

30  
31  
32

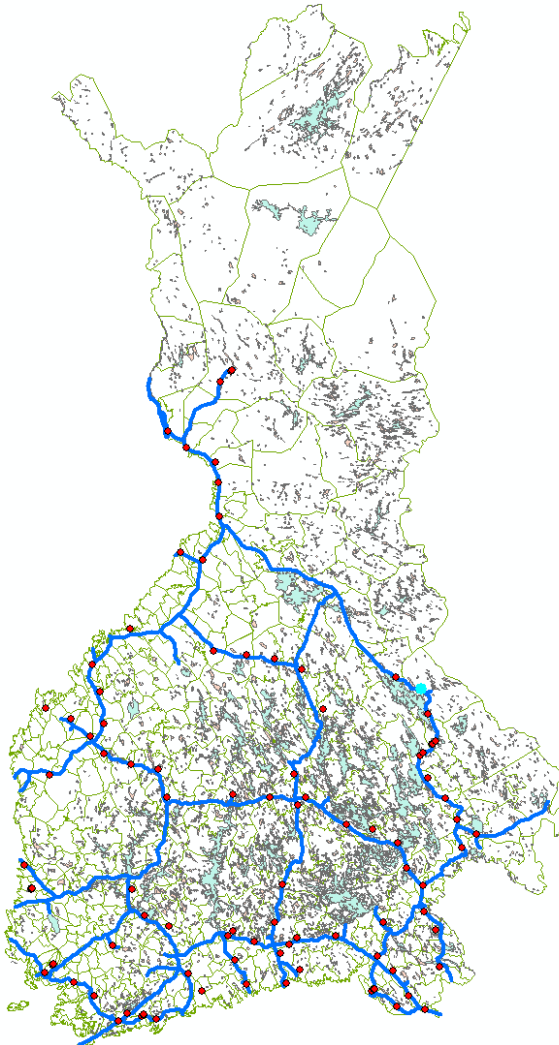

33  
34 Fig. 1. Parishes, railroads (blue lines), and compartments along the inventory lines that were  
35 assigned into class “railroads”.

36  
37 6. Using parish borders and railroads, we then placed each compartment on the map. The railroad  
38 information was at this point used only to determine the direction in which the inventory crew  
39 was moving at a specific part of a line. We did not use this data to make any location  
40 adjustments, but retained it as “independent” data to verify the location procedure (see below).

41  
42 7. As some compartments fell on water bodies, we moved each compartment to the next stretch  
43 of dry land along the line. Water bodies were obtained from the GLWD-database (Lehner and  
44 Döll 2004).

45

46 8. From these compartments, we then compared the recorded parish information to the digitized  
47 parish map, and calculated the percentage of compartments falling into the correct parish.

48

49 9. To make small adjustments to the exact line location, we moved each line origin at 500 m  
50 intervals up to 3 km NW and SE directions (i.e. 500 m, 1000 m, 1500 m, 2000 m, 2500 m and  
51 3000 m) and re-calculated the proportion of compartments falling into the correct parish. We  
52 selected the option with the most correct parishes as the location of the lines for locating the  
53 plots. As we have no information on the exact origin of the lines, nor the small changes in the  
54 direction along the line, this procedure was an attempt to improve the location estimate, but it  
55 should be noted that it is by no means assumed as the exact location (see below).

56

57 10. As the last compartments along each line fell short of the line on the map, we then divided  
58 the missing distance equally to all compartment along the line.

59

60 11. To assess the uncertainty related to the locations independently, we compared the locations  
61 of compartments recorded as railroads to the nearest railroad. Assuming that the minimum  
62 distance represents the error associated with the locations, 90% of the compartments fell within 8  
63 km of their true location (Fig. 2), which we deemed sufficient for our analyses. In addition, there  
64 were a few outliers in the data that were located in parishes that did not have railroads in the  
65 Atlas of 1925. We suspect that these may have been either small stretches of railroad related to  
66 industrial activities, or recording errors, not errors due to our location procedure, so the true  
67 location error is likely to be smaller than the 90% / 8 km in the southern part of the country.

68

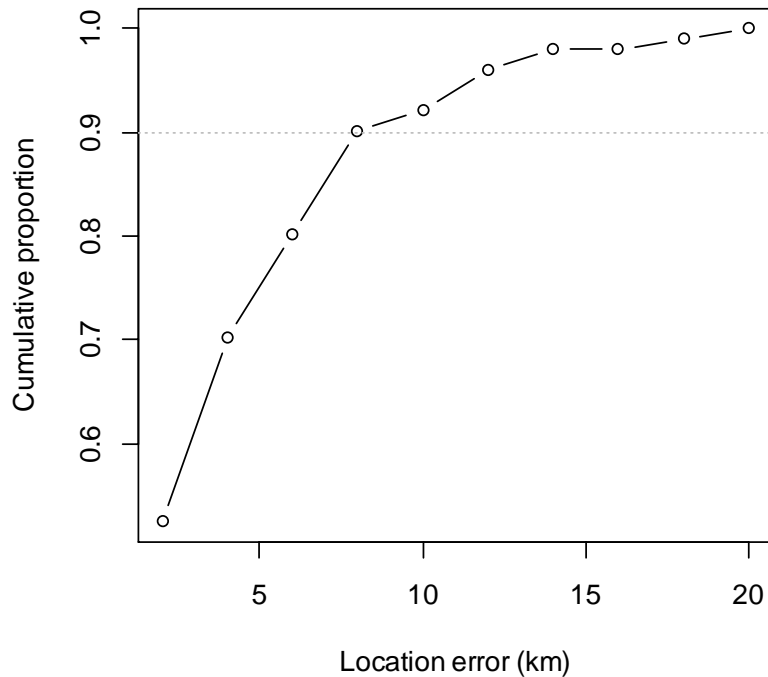

69  
 70 Fig. 2. The cumulative proportion of railroad compartments and their minimum distance to the  
 71 nearest railroad, as digitized from the Atlas of Finland 1925.

72  
 73  
 74 11. Once the compartments were located, we located the sample plots by matching the line and  
 75 compartment information that was recorded for each plot. In cases in which there were multiple  
 76 sample plots located in the same compartment, we distributed the plots to 1 km distance from  
 77 one another along the line, in the direction the line had been measured.

78  
 79 **References**

80 Ilvessalo Y (1927) The forests of Suomi (Finland). Results of the general survey of the forests of  
 81 the country carried out during the years 1921-1924. *Communicationes Instituti Forestalis*  
 82 *Fenniae* 11:421  
 83 Lehner B, Döll P (2004) Development and validation of a global database of lakes, reservoirs  
 84 and wetlands. *Journal of Hydrology* 296:1–22.  
 85 <https://doi.org/10.1016/j.jhydrol.2004.03.028>  
 86 Witting R (1928) Atlas of Finland 1925. Suomen Maantieteellinen Seura, Helsinki.
