# Supplementary material for: Human impact on forests in early twentieth century Finland
Source: Springer Nature journal article supplement (doi:10.1007/s10980-023-01688-w), 2023-05-31

Supplementary Information to "Human impact on forests of early 20th century Finland" submitted to Landscape Ecology, by: Tuomas Aakala, Niko Kulha, and Timo Kuuluvainen.

Corresponding author: Tuomas Aakala, School of Forest Sciences, University of Eastern Finland. E-mail: [tuomas.aakala@uef.fi](mailto:tuomas.aakala@uef.fi)

Supplementary Information 2: Maps of smoothed variables with leave-one-out validation

Below, we have included smoothed maps for each of the structural-compositional feature we analyzed. In these versions of the maps, we have superimposed the results of the leave-one-out validation on the maps. The height of each bar is proportional to the difference between the smoothed and the observed value at each sample plot, when that particular plot is not included in the smoothing. In other words, it represents the smoothing accuracy of each variable among nearby plots.

# Size classes

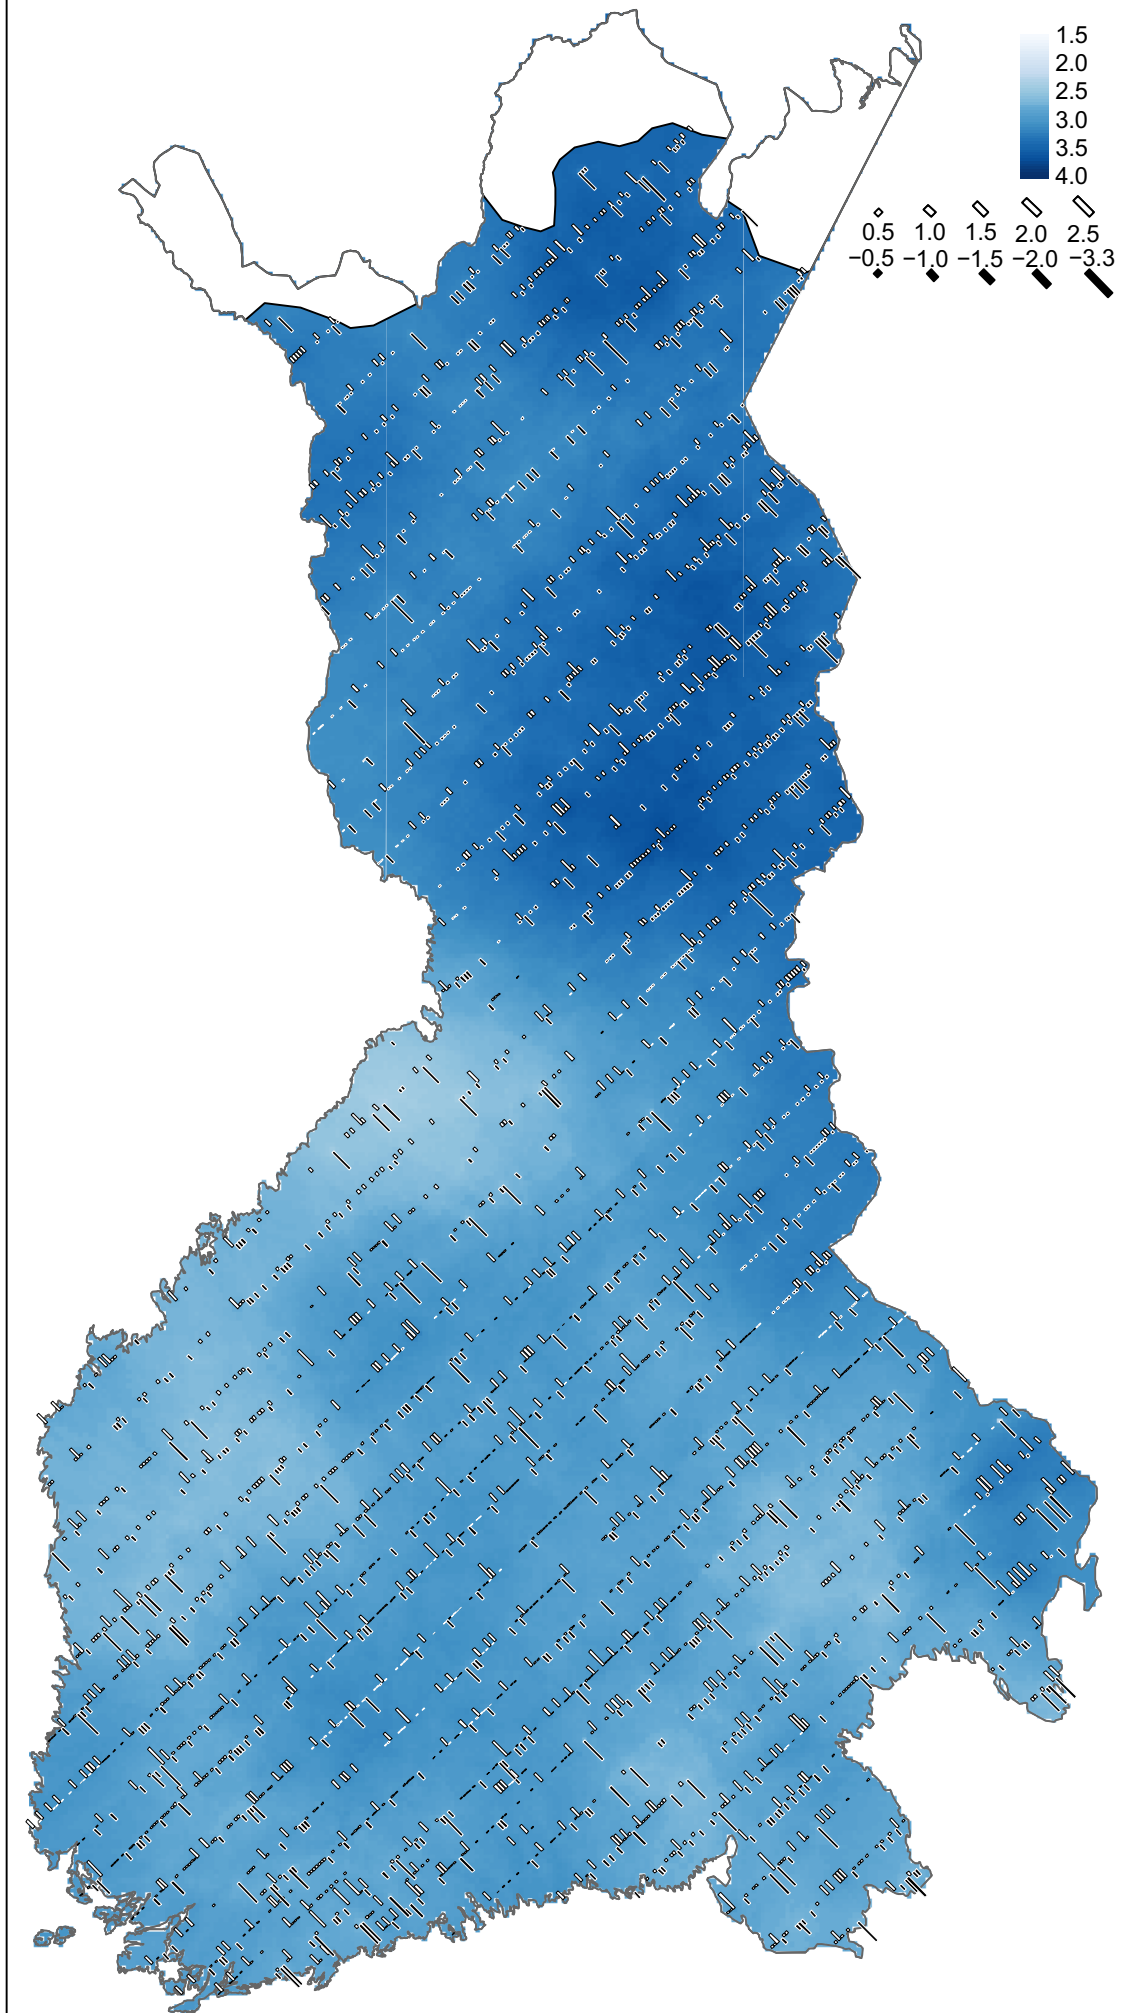

# Oldest tree age class

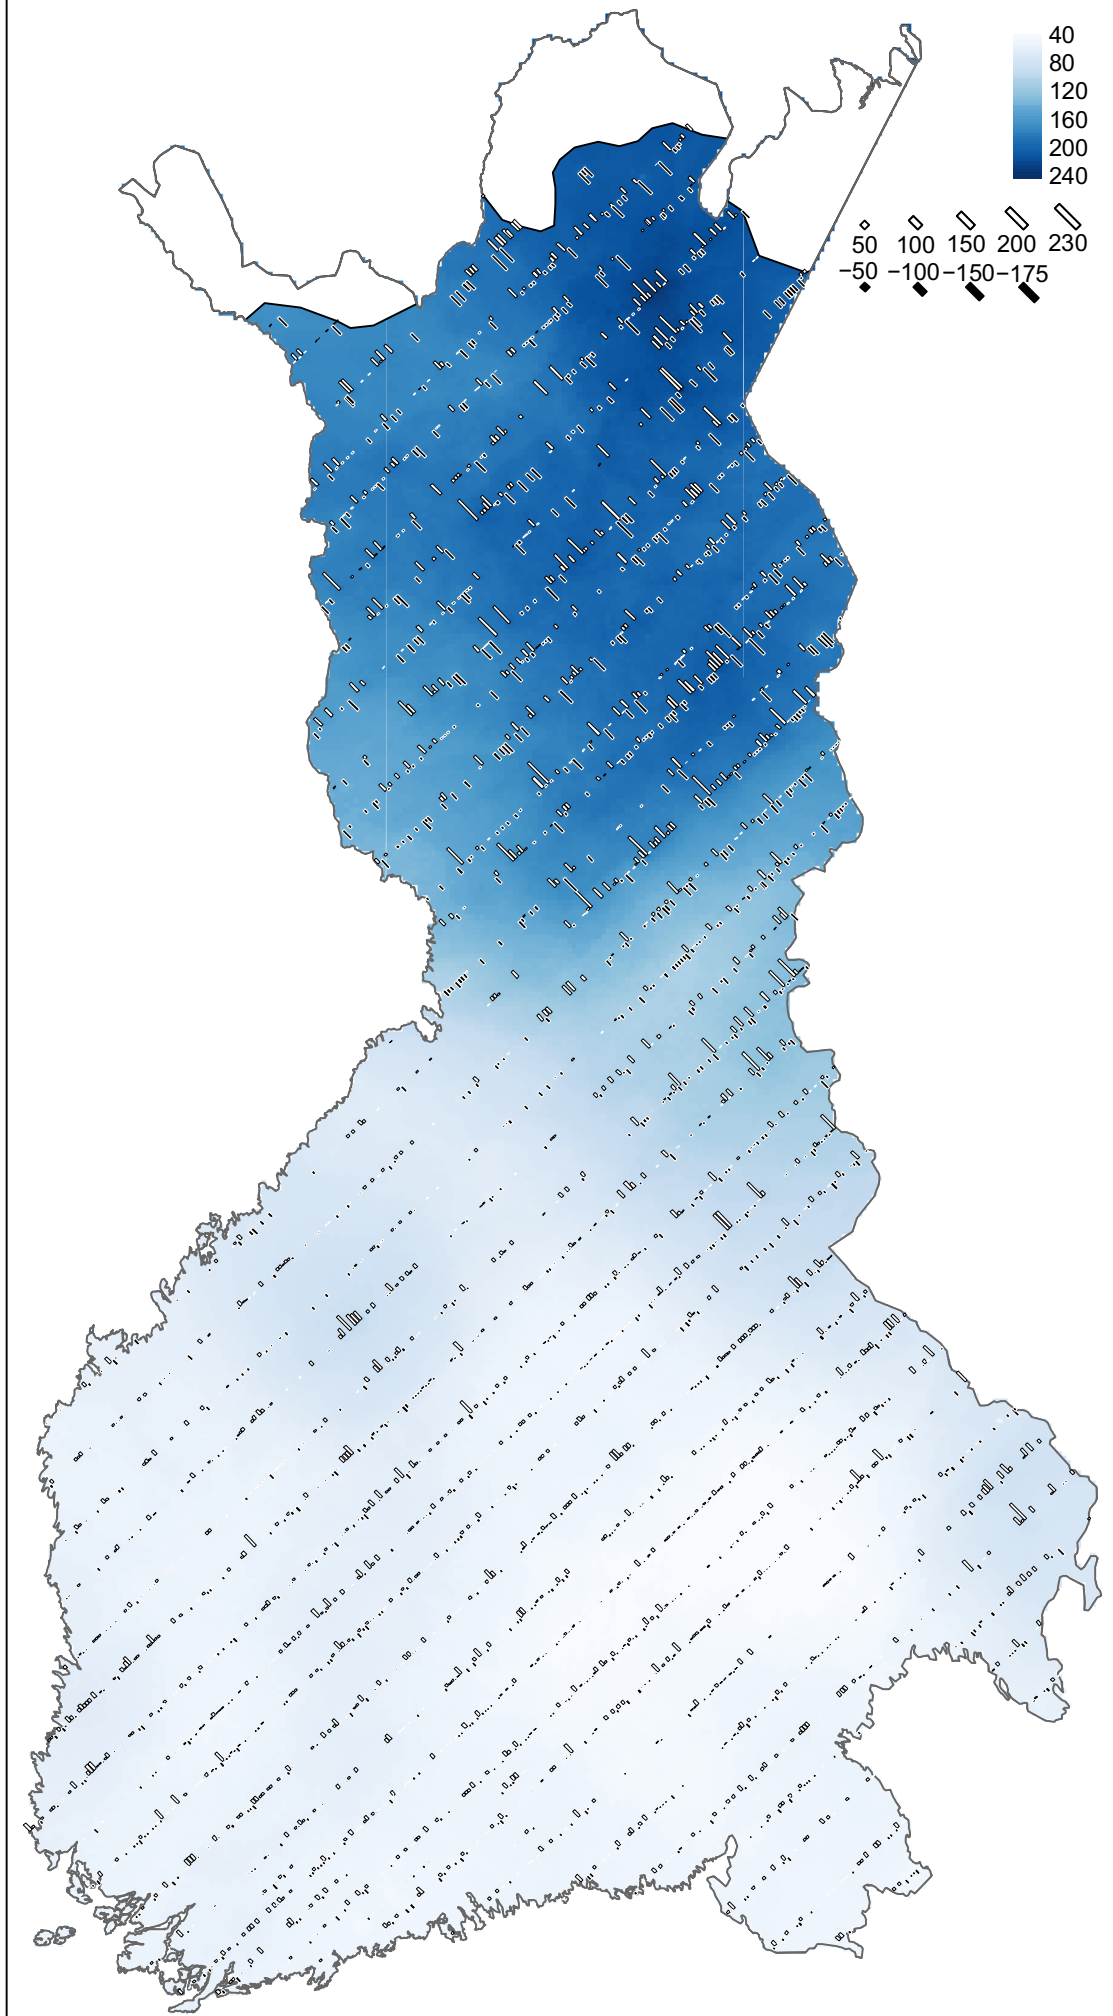

# Pine proportion

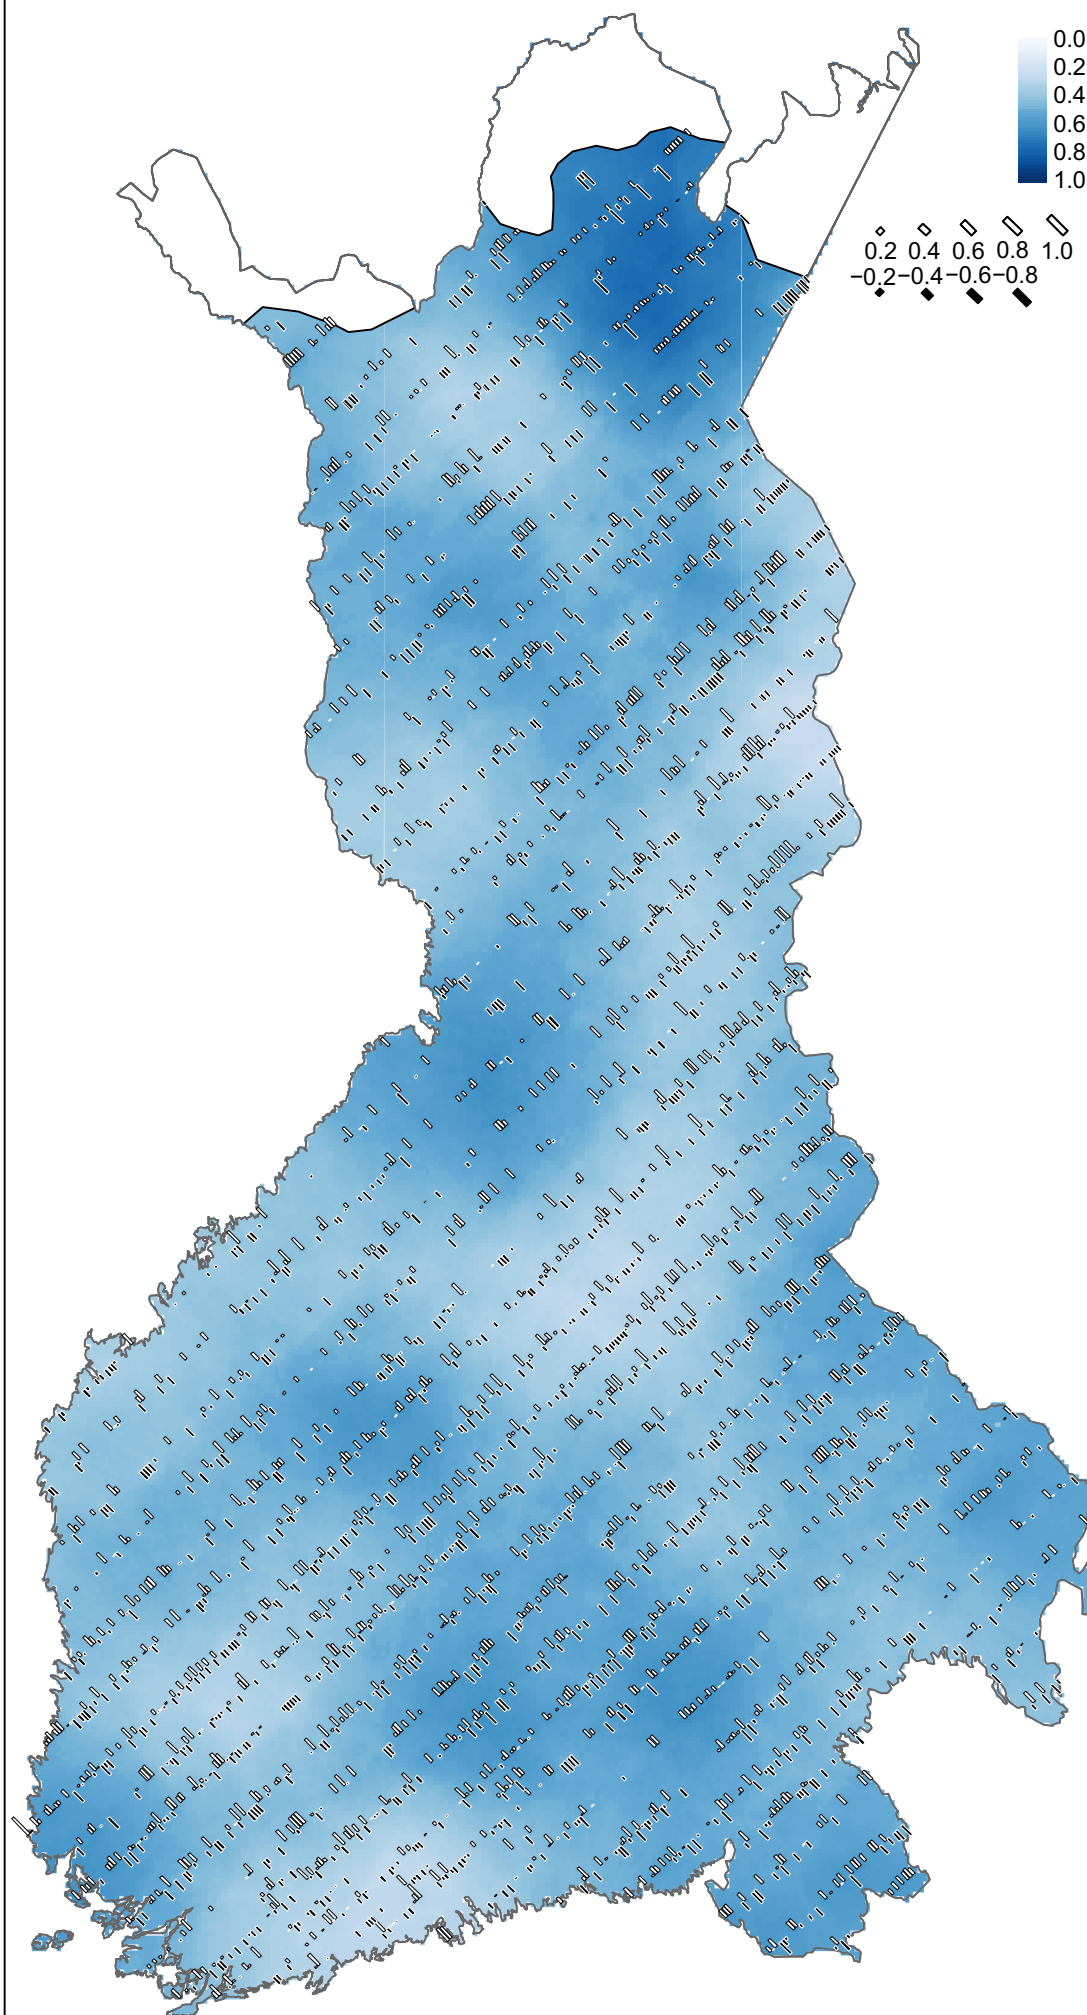

# Spruce proportion

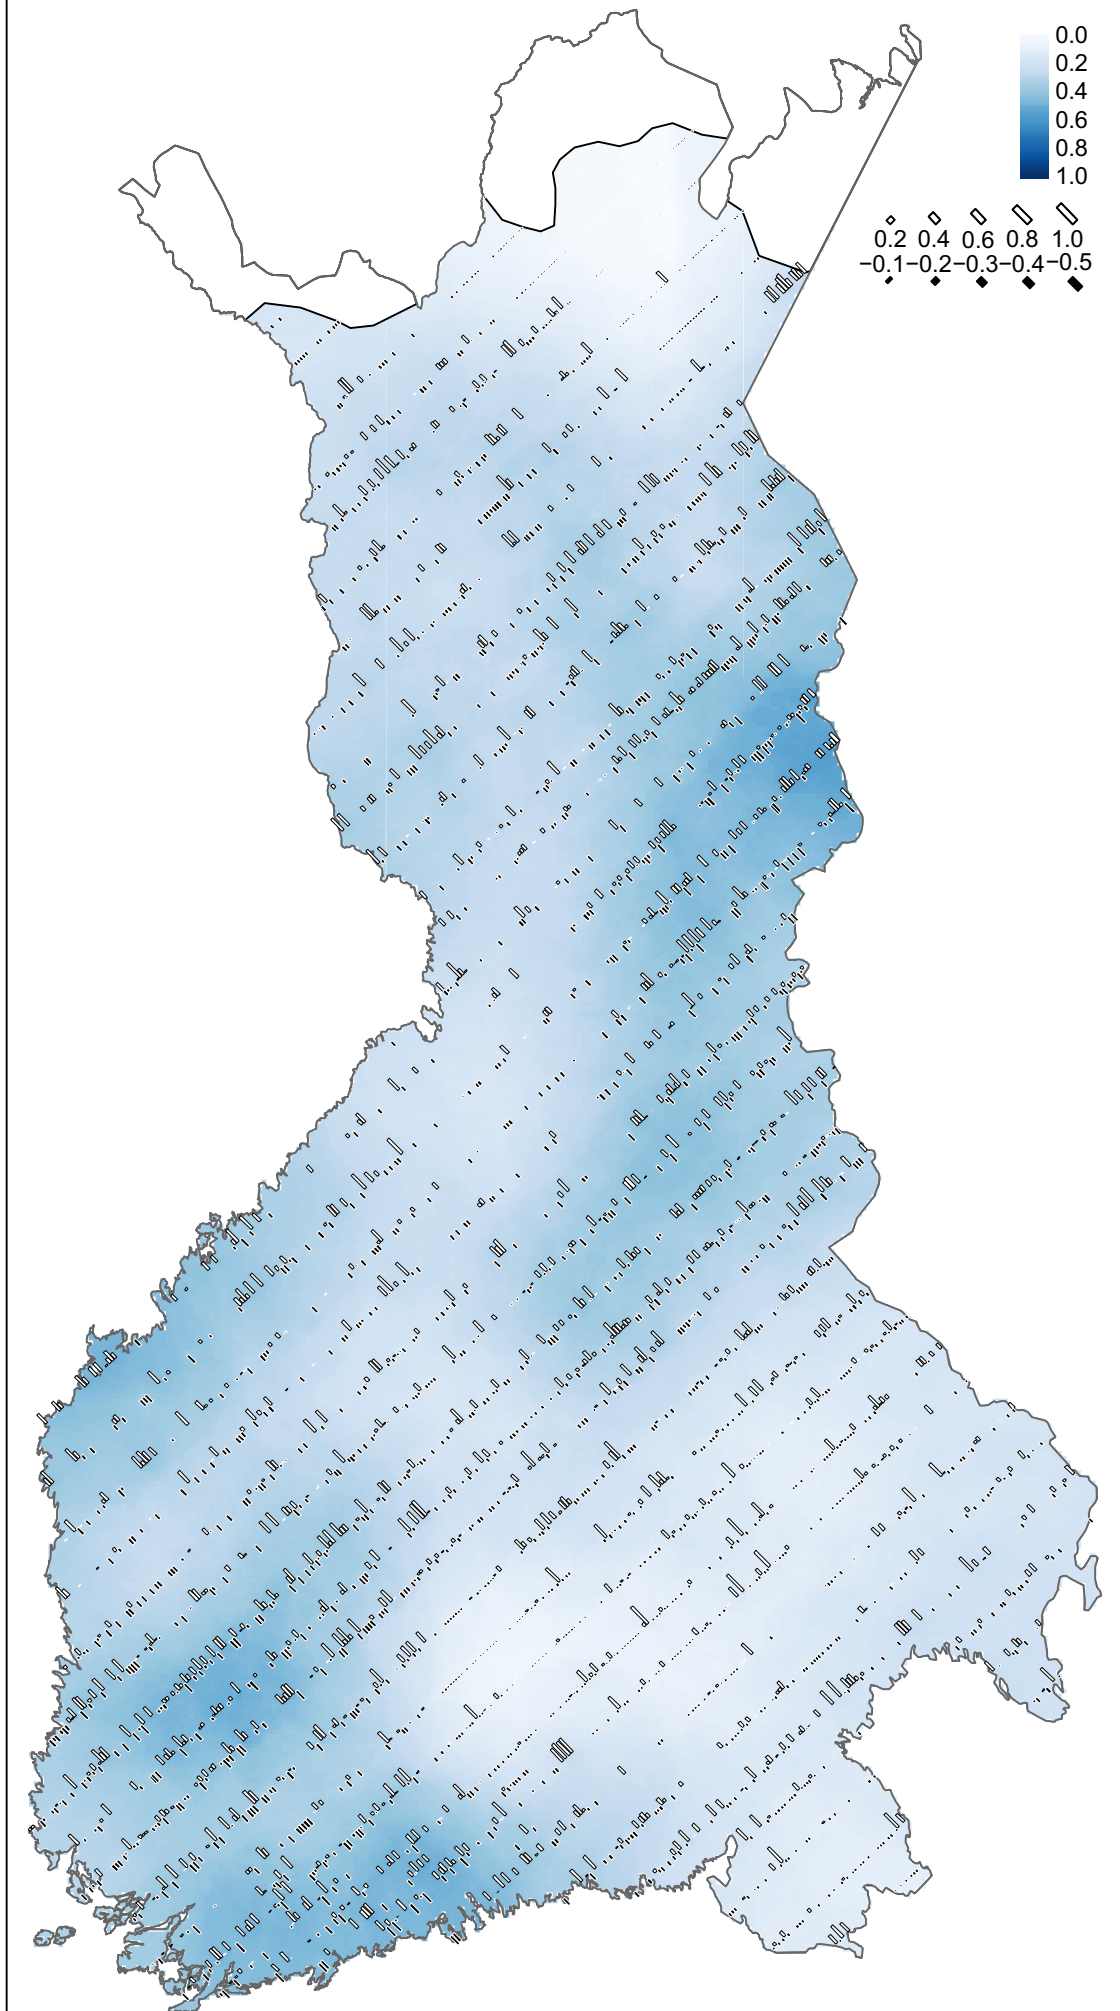

# Birch proportion

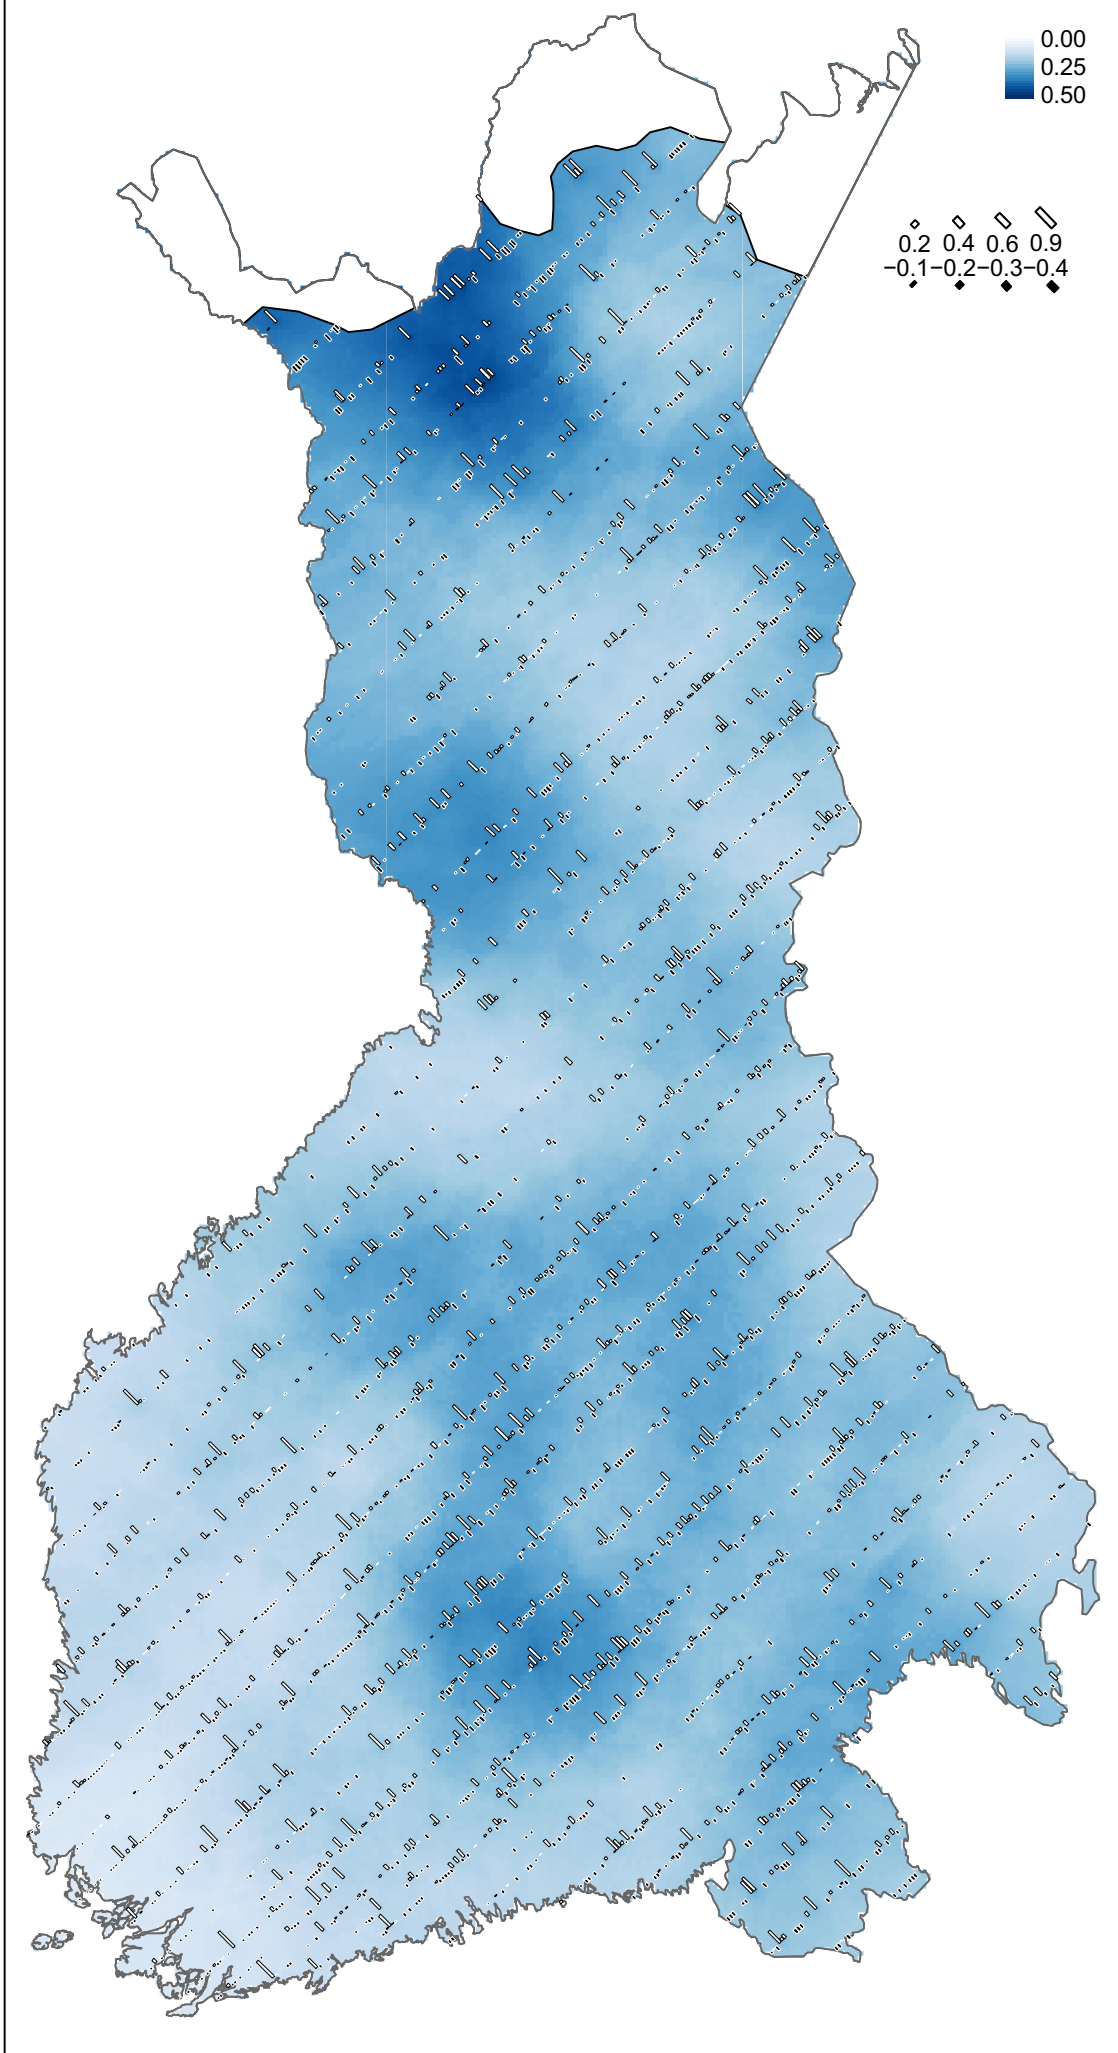

# Proportion of other deciduous trees

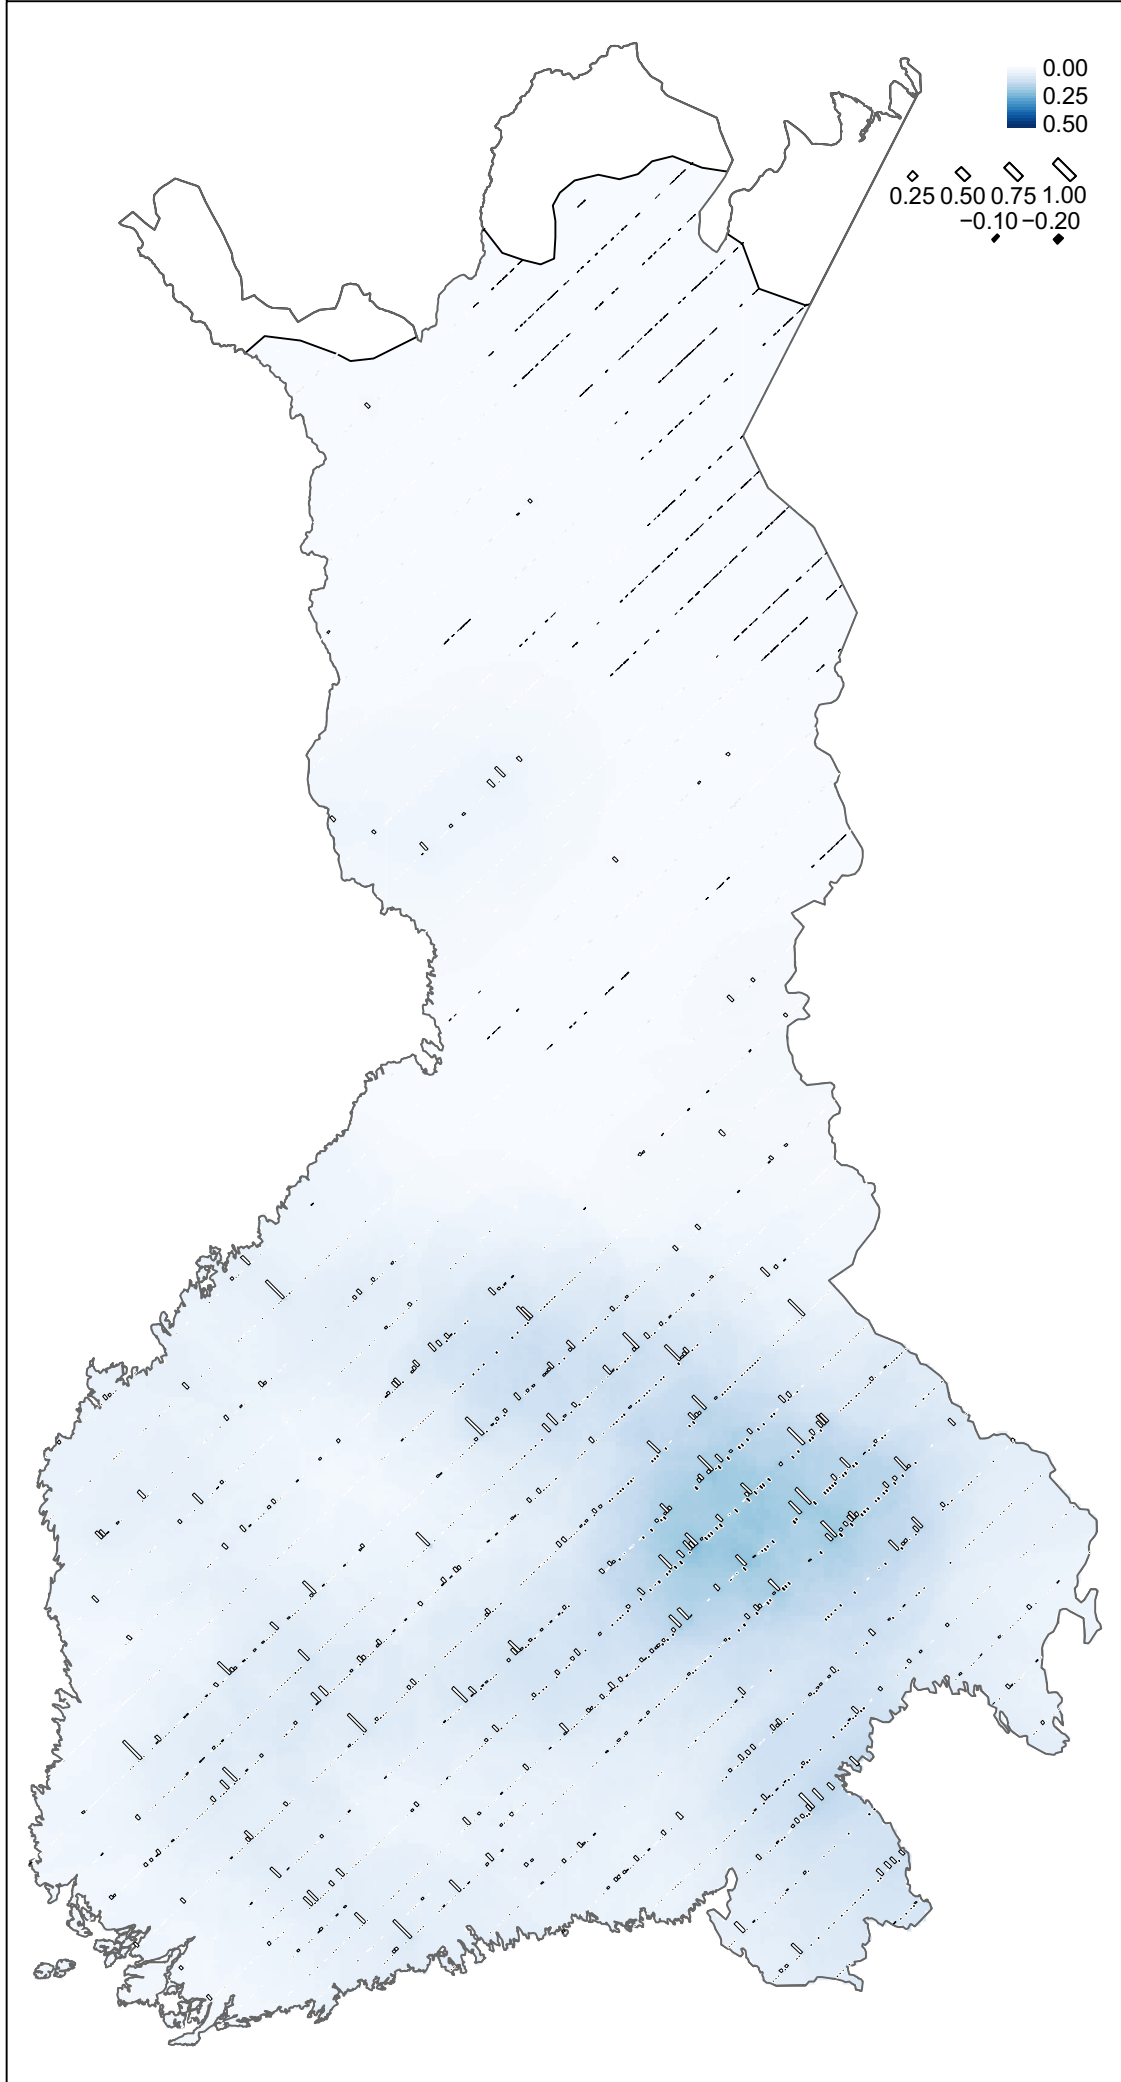

# Species richness

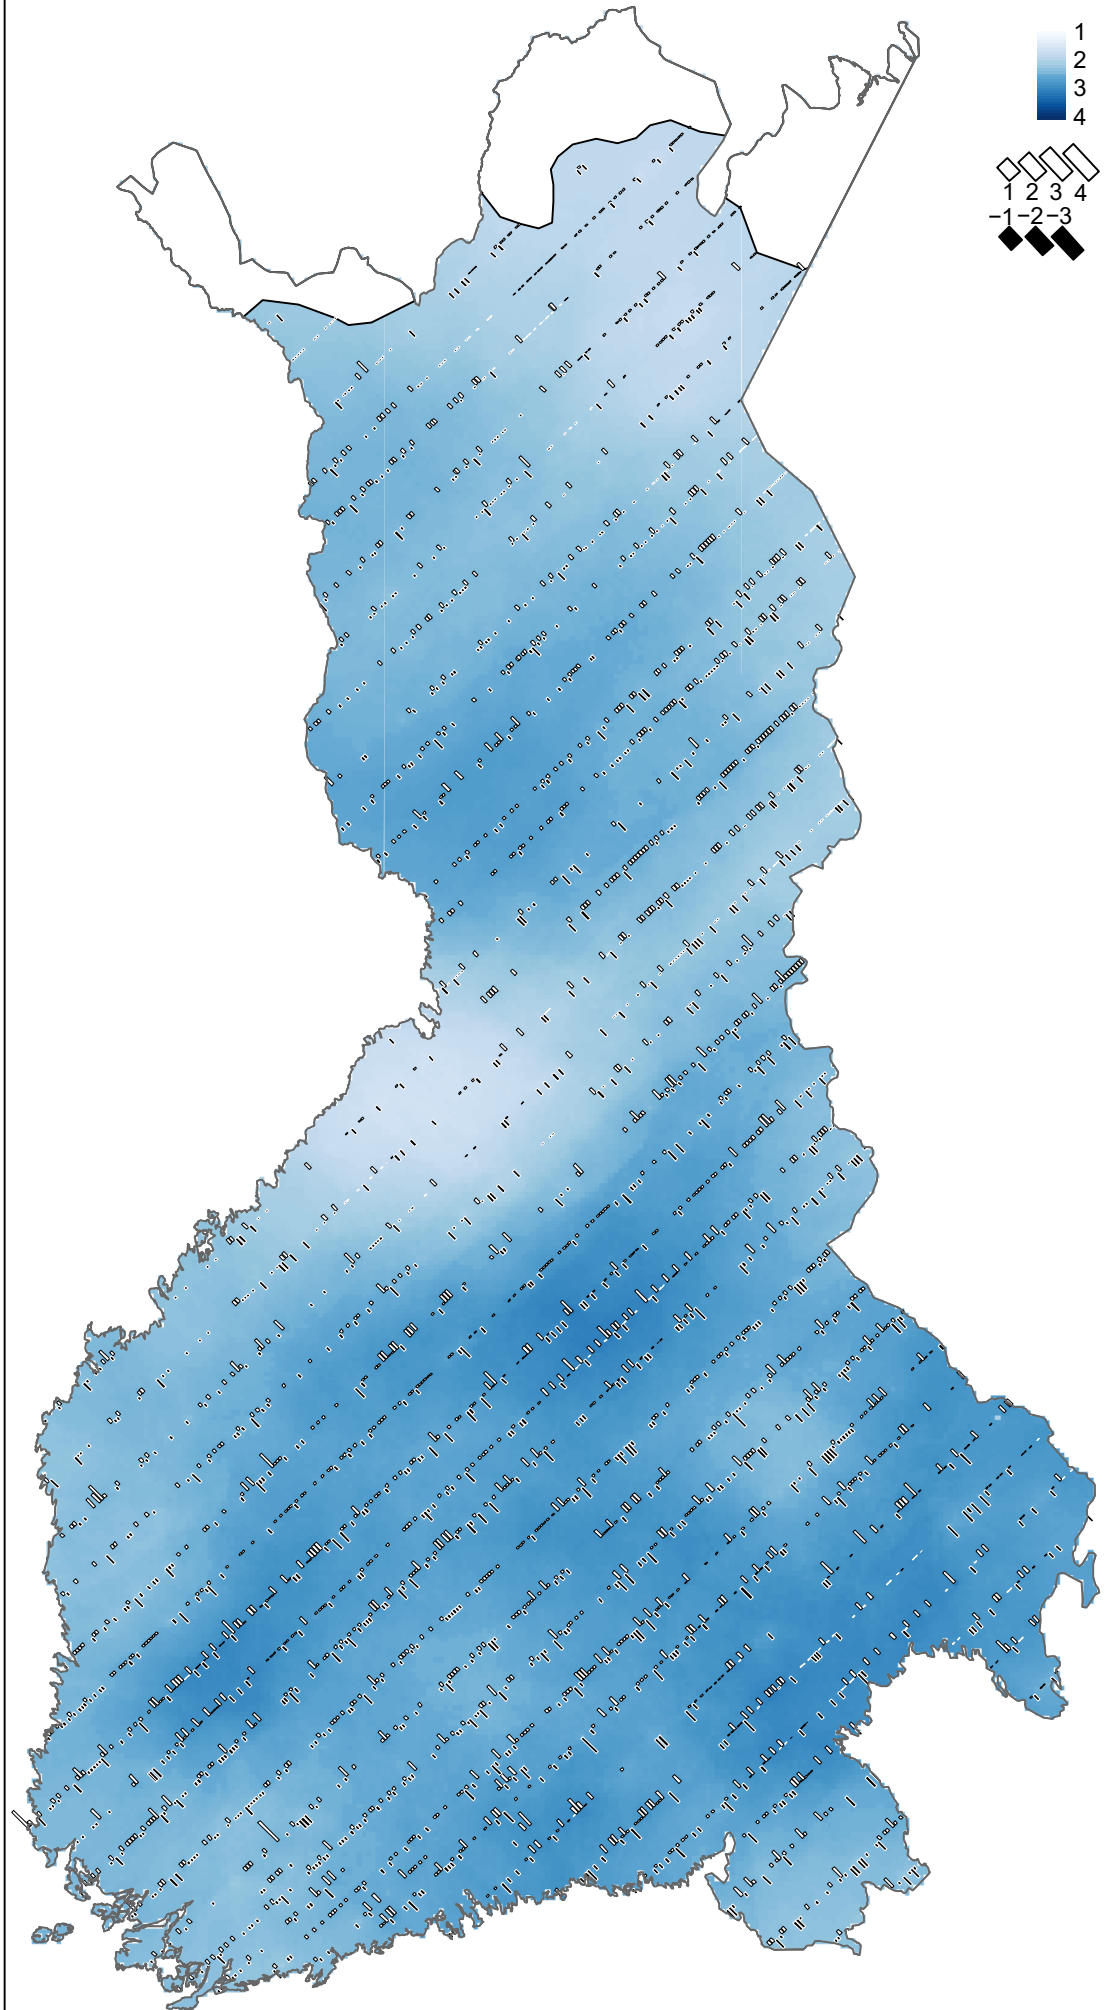



# Tree species diversity

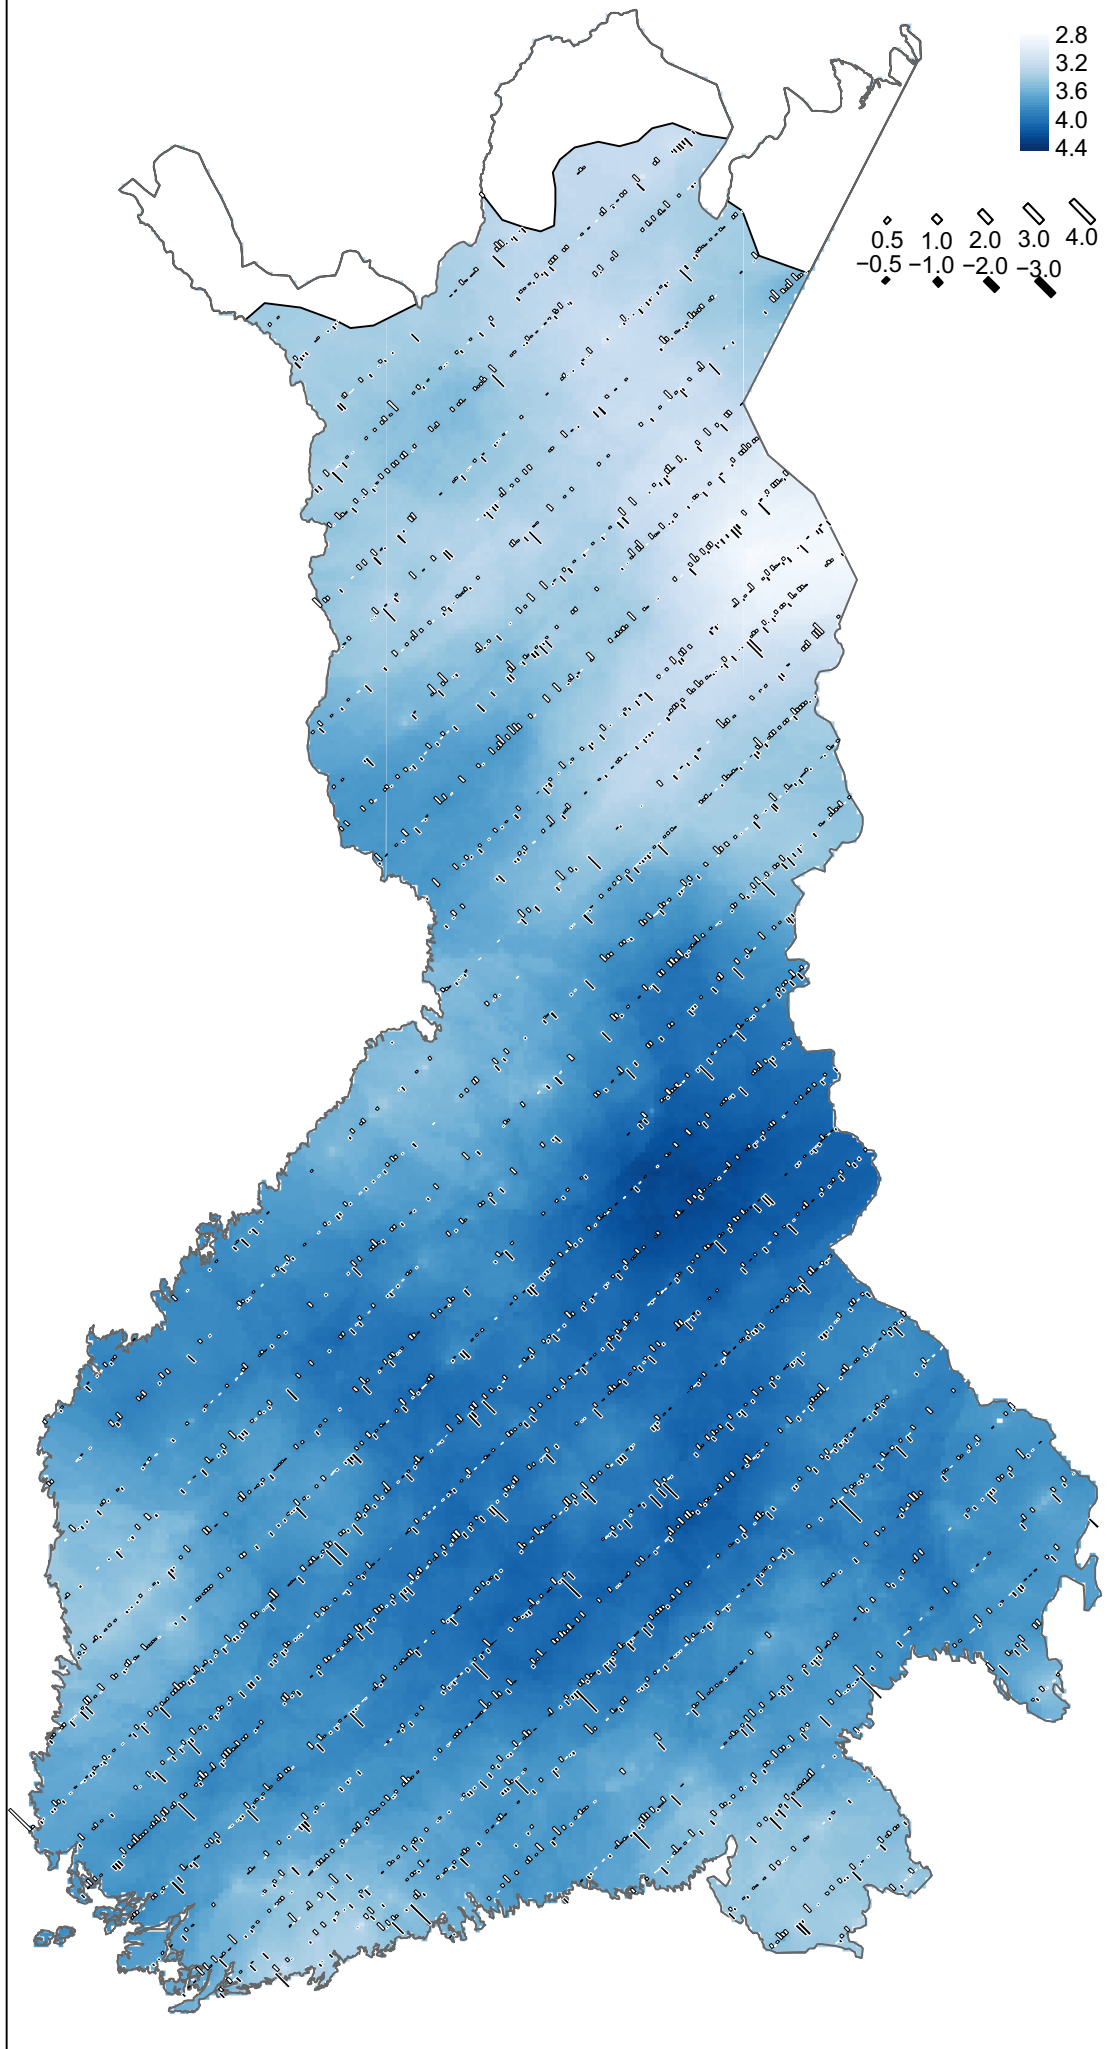

Supplement: 10980_2023_1688_MOESM2_ESM.pdf [file 10980_2023_1688_MOESM2_ESM.pdf]
