# Supplementary material for: Human impact on forests in early twentieth century Finland
Source: Springer Nature journal article supplement (doi:10.1007/s10980-023-01688-w), 2023-05-31
Supplement: 10980_2023_1688_MOESM3_ESM.pdf [file 10980_2023_1688_MOESM3_ESM.pdf]

Supplementary Information to "Human impact on forests of early 20<sup>th</sup> century Finland" submitted to Landscape Ecology, by: Tuomas Aakala, Niko Kulha, and Timo Kuuluvainen.

Corresponding author: Tuomas Aakala, School of Forest Sciences, University of Eastern Finland. E-mail: tuomas.aakala@uef.fi

### Supplementary Information 3: Partial dependence plots

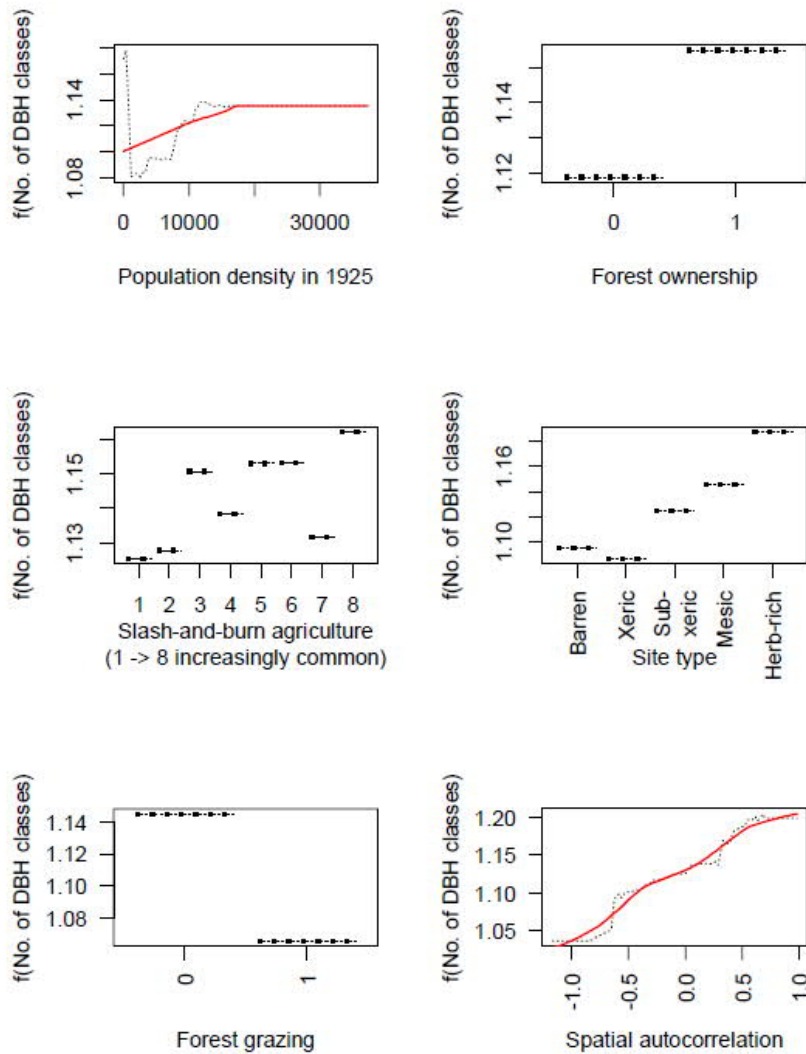

Fig. 1. Partial dependence plots for no. of DBH classes. Red line is a LOESS smoother with a span of 0.4, drawn for continuous explanatory variables.

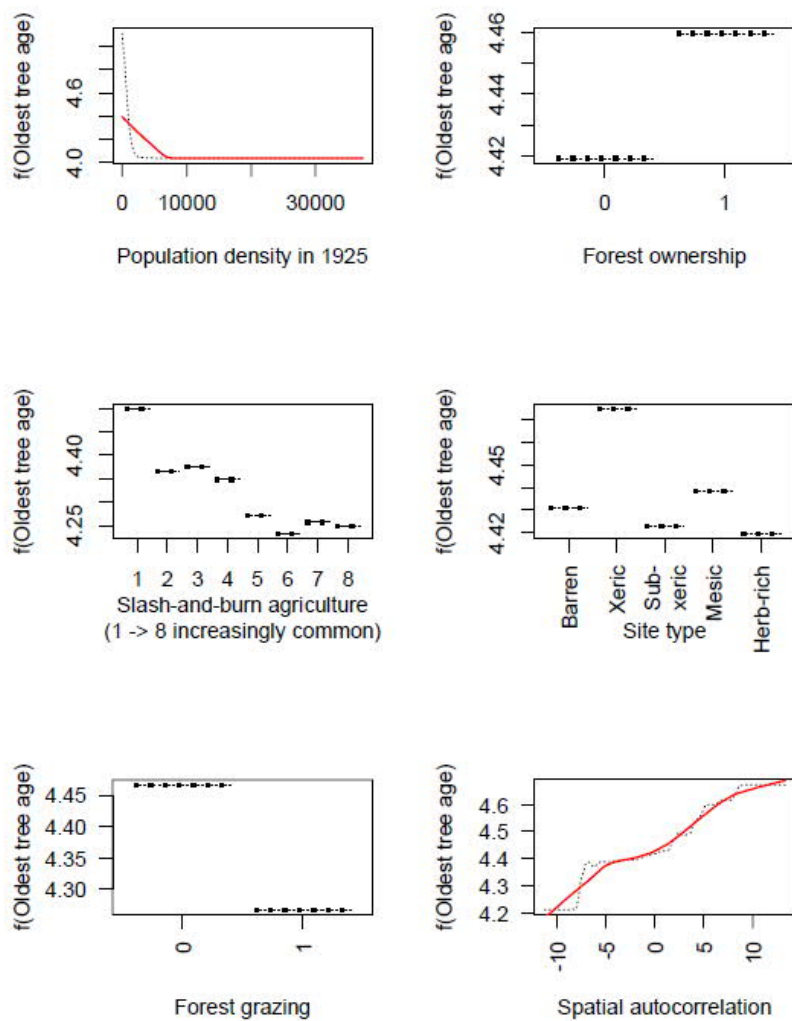

Fig. 2. Partial dependence plots for the age of the oldest tree age class. Red line is a LOESS smoother with a span of 0.4, drawn for continuous explanatory variables.

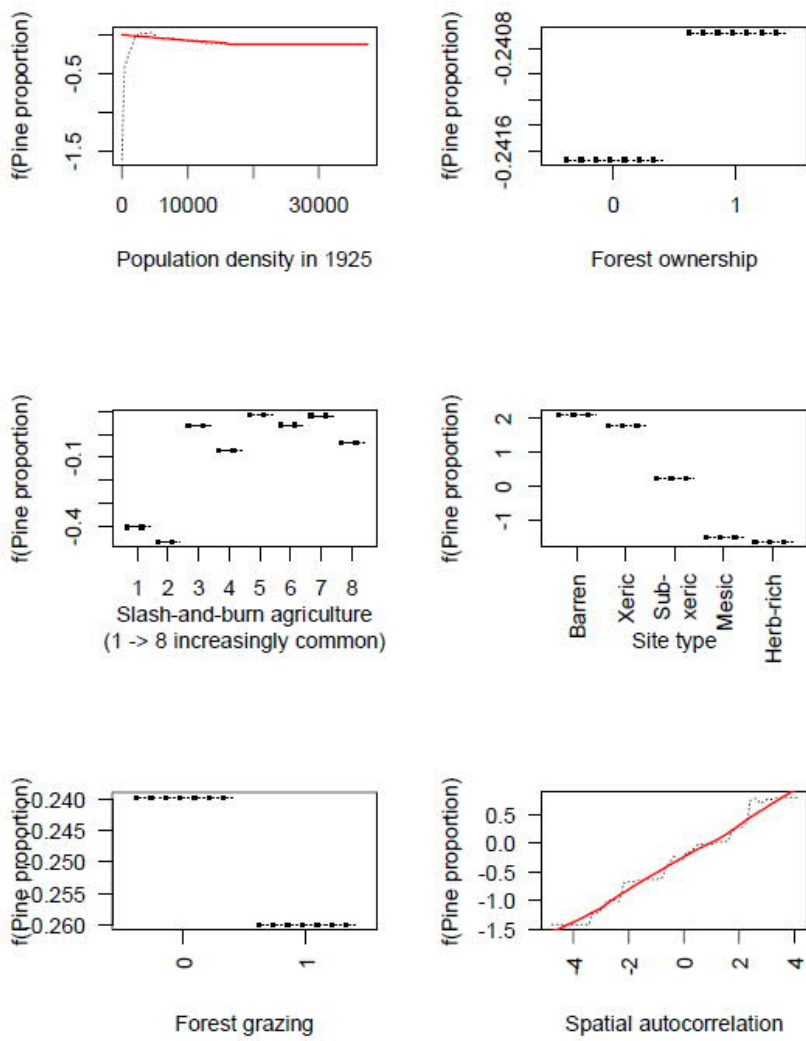

Fig. 3. Partial dependence plots for the proportion of Scots pine out of the total basal area. Red line is a LOESS smoother with a span of 0.4, drawn for continuous explanatory variables.

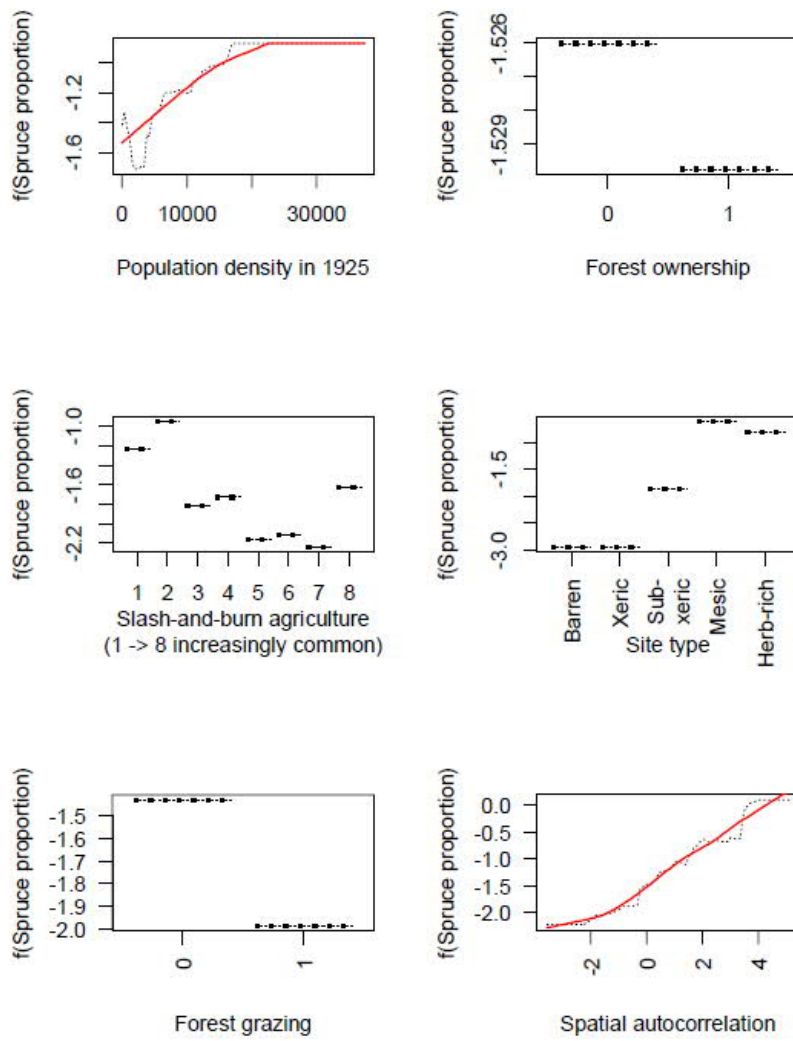

Fig. 4. Partial dependence plots for the proportion of Norway spruce out of the total basal area. Red line is a LOESS smoother with a span of 0.4, drawn for continuous explanatory variables.

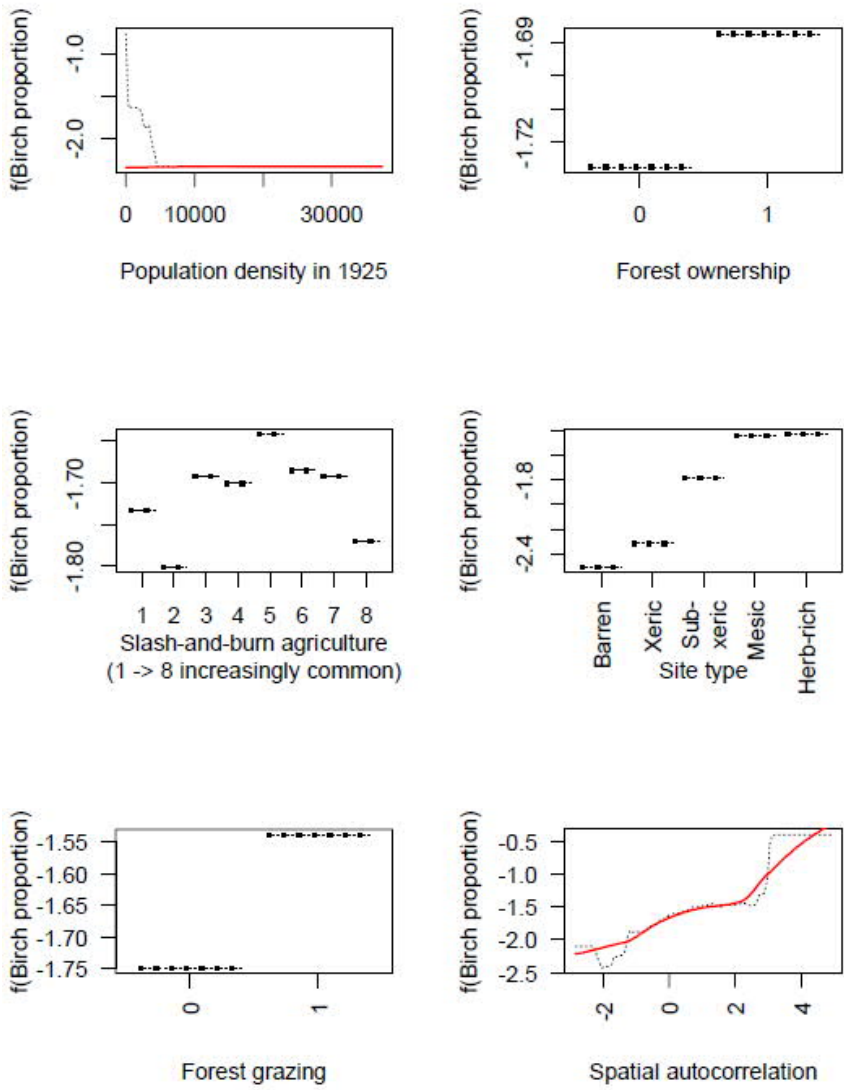

Fig. 5. Partial dependence plots for the proportion of birch out of the total basal area. Red line is a LOESS smoother with a span of 0.4, drawn for continuous explanatory variables.

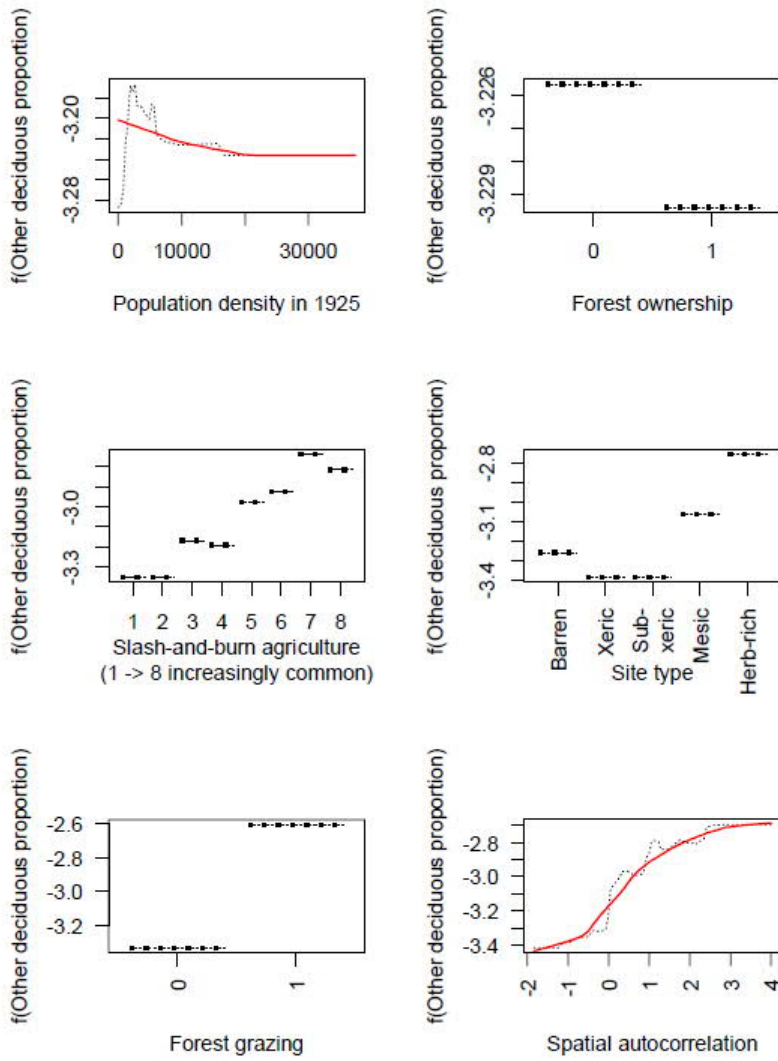

Fig. 6. Partial dependence plots for the proportion of other deciduous trees out of the total basal area. Red line is a LOESS smoother with a span of 0.4, drawn for continuous explanatory variables.

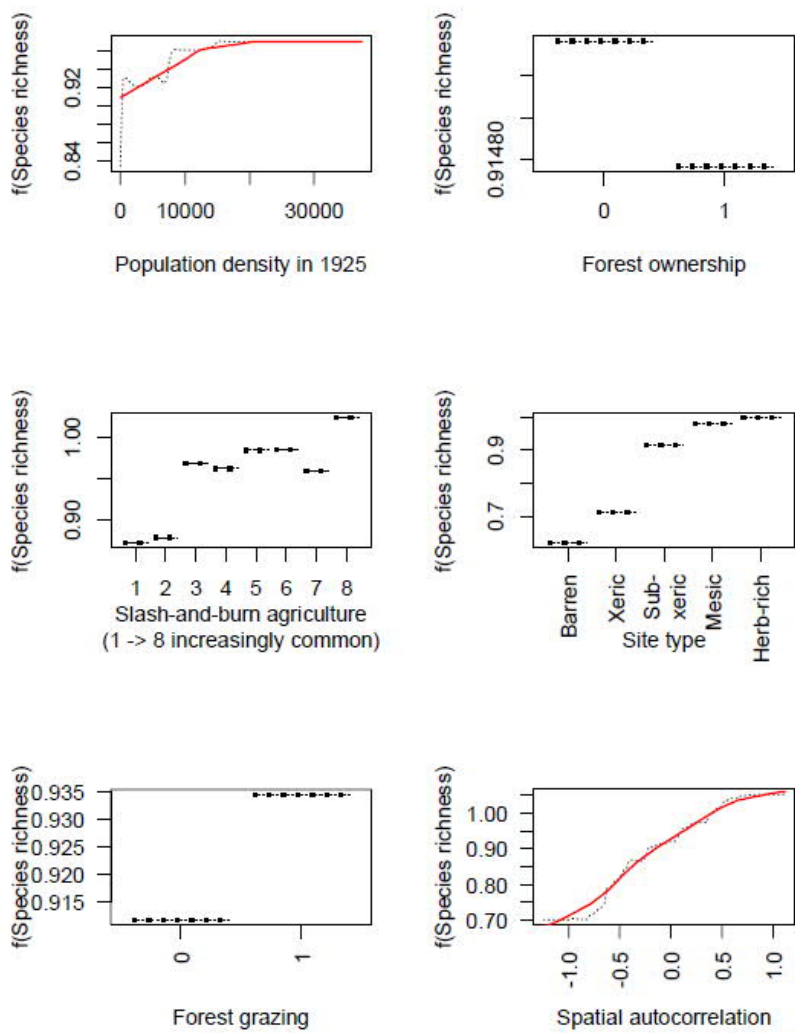

Fig. 7. Partial dependence plots for species richness. Red line is a LOESS smoother with a span of 0.4, drawn for continuous explanatory variables.

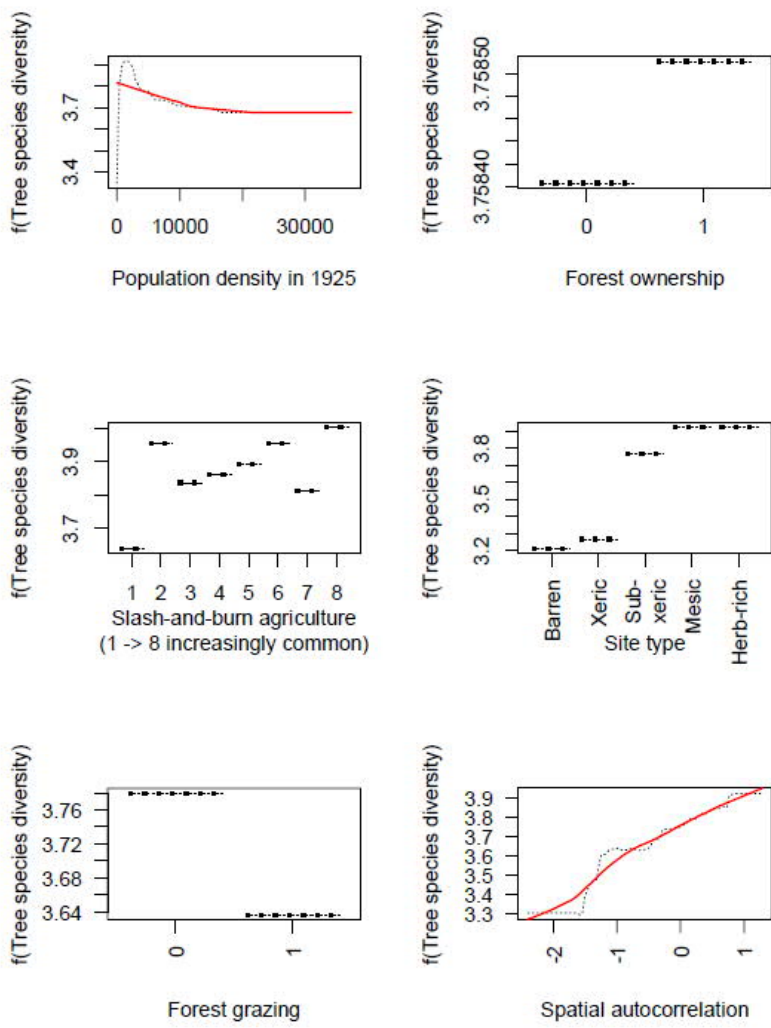

Fig. 8. Partial dependence plots for the Shannon diversity index. Red line is a LOESS smoother with a span of 0.4, drawn for continuous explanatory variables.
