# Supplementary material for: Human impact on forests in early twentieth century Finland
Source: Springer Nature journal article supplement (doi:10.1007/s10980-023-01688-w), 2023-05-31
Supplement: 10980_2023_1688_MOESM4_ESM.pdf [file 10980_2023_1688_MOESM4_ESM.pdf]

Supplementary Information to "Human impact on forests of early 20th century Finland" submitted to Landscape Ecology, by: Tuomas Aakala, Niko Kulha, and Timo Kuuluvainen.

Corresponding author: Tuomas Aakala, School of Forest Sciences, University of Eastern Finland. E-mail: tuomas.aakala@uef.fi

#### Supplementary Information 4: Spatial autocorrelation of residuals

Fig. 1. Spatial autocorrelation of residuals of the model for no. of DBH classes, between k neighboring points, before and after correcting for spatial autocorrelation.

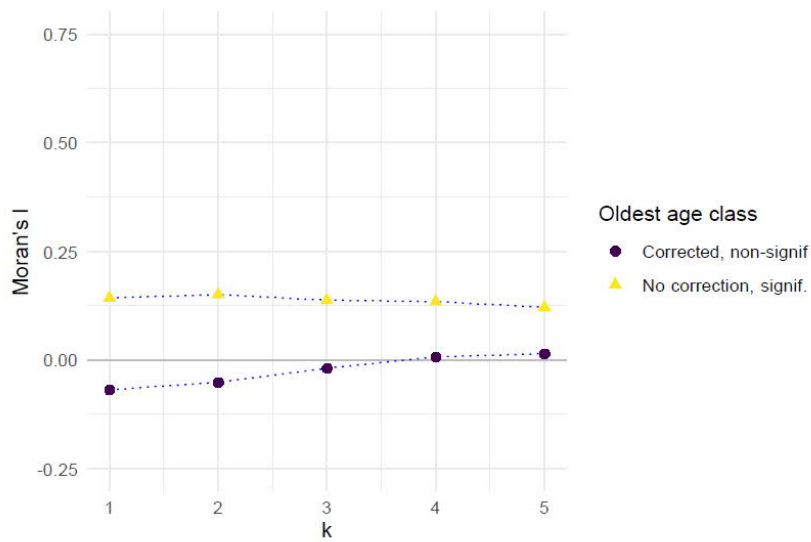

Fig. 2. Spatial autocorrelation of residuals of the model for the oldest age class, between k neighboring points, before and after correcting for spatial autocorrelation.

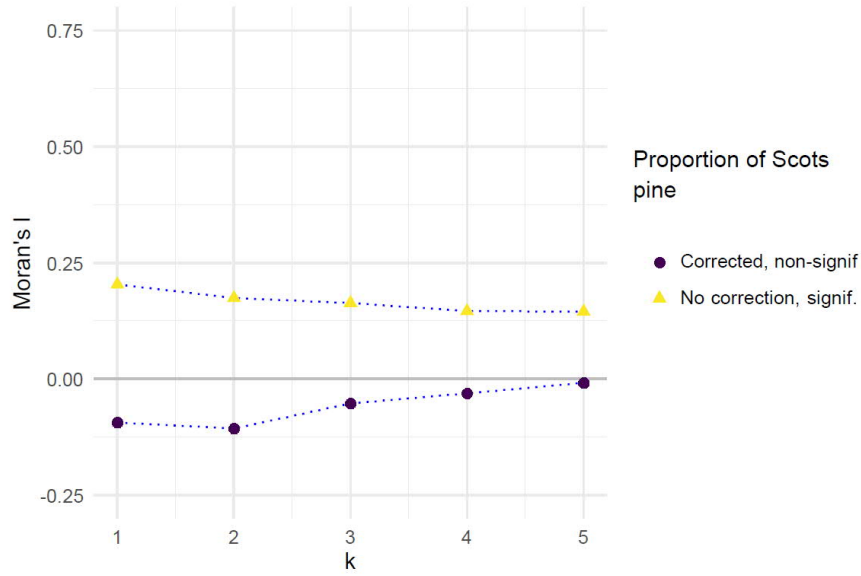

Fig. 3. Spatial autocorrelation of residuals of the model for proportion of Scots pine basal area out of total basal area, between k neighboring points, before and after correcting for spatial autocorrelation.

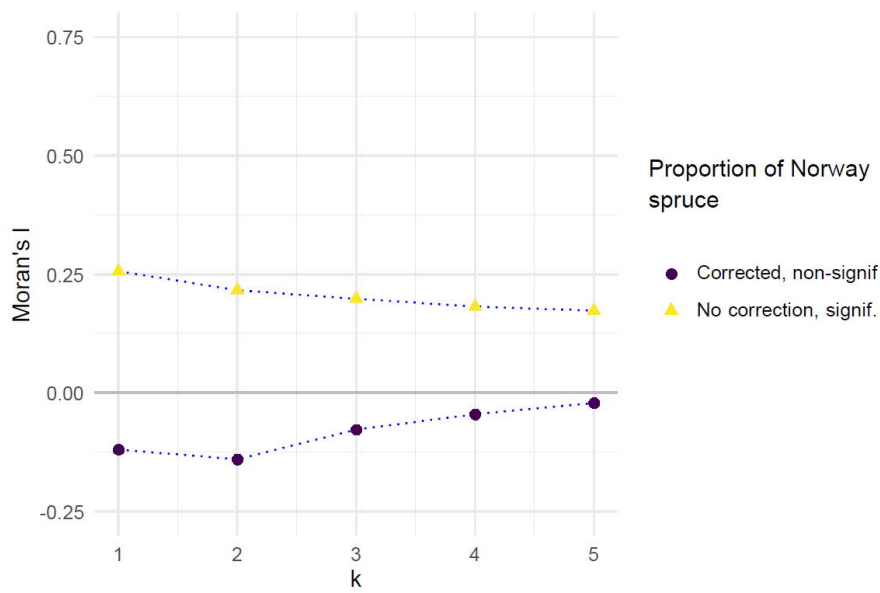

Fig. 4. Spatial autocorrelation of residuals of the model for proportion of Norway spruce basal area out of total basal area, between k neighboring points, before and after correcting for spatial autocorrelation.

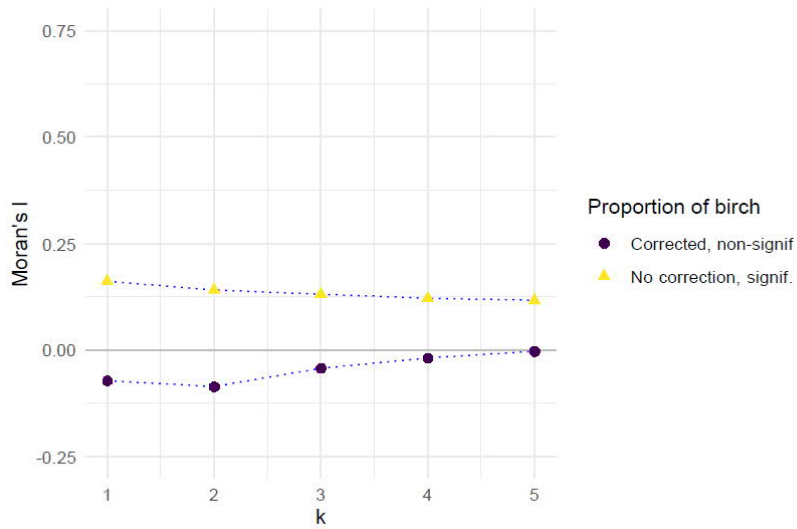

Fig. 5. Spatial autocorrelation of residuals of the model for proportion of birch basal area out of total basal area, between  $k$  neighboring points, before and after correcting for spatial autocorrelation.

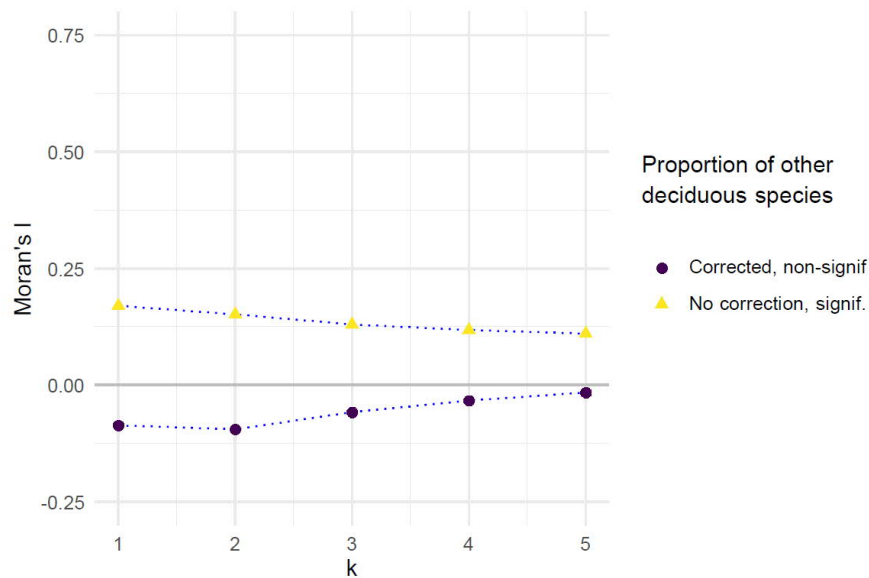

Fig. 6. Spatial autocorrelation of residuals of the model for proportion of other deciduous trees basal area out of total basal area, between  $k$  neighboring points, before and after correcting for spatial autocorrelation.

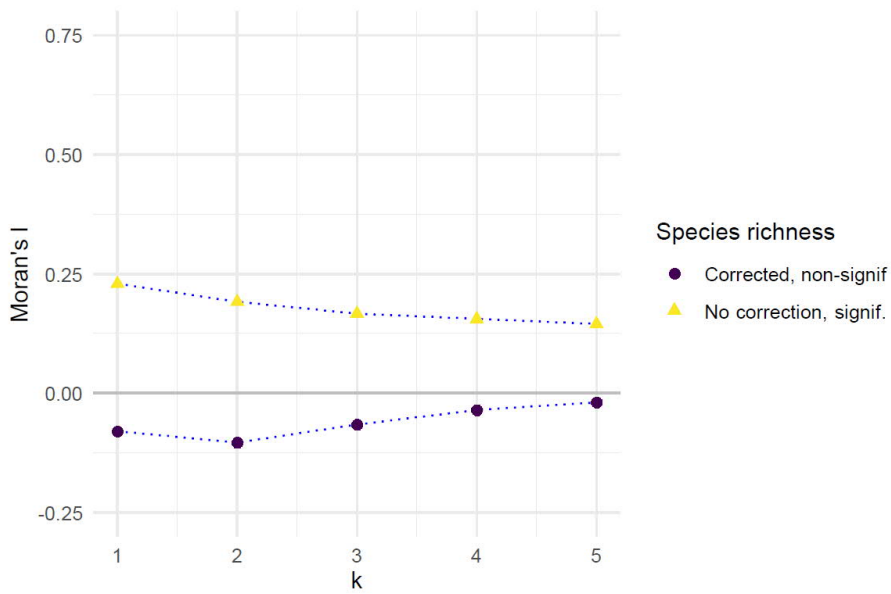

Fig. 7. Spatial autocorrelation of residuals of the model for species richness, between k neighboring points, before and after correcting for spatial autocorrelation.

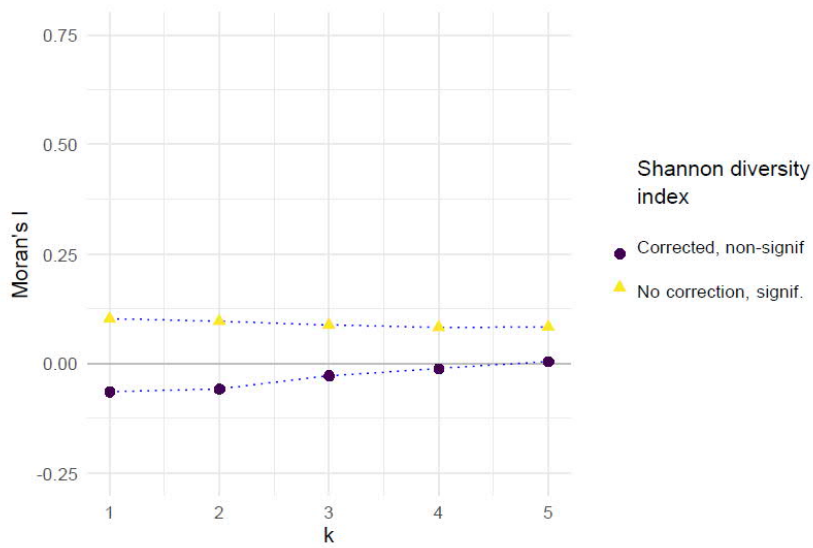

Fig. 8. Spatial autocorrelation of residuals of the model for Shannon diversity index, between k neighboring points, before and after correcting for spatial autocorrelation.
